# Supplementary material for: Digital colloid-enhanced Raman spectroscopy for the pharmacokinetic detection of bioorthogonal drugs
Source: Royal Society of Chemistry journal article supplement (doi:10.1039/d4sc02553a), 2024-01-01
Supplement: d4sc02553a1.pdf [file d4sc02553a1.pdf]

## Supporting Information

# Digital colloid-enhanced Raman spectroscopy for the pharmacokinetic detection of bioorthogonal drugs

*Xinyuan Bi,<sup>Δ,†</sup> Zhicheng He,<sup>Δ,†</sup> Zhewen Luo,<sup>†</sup> Wensi Huang,<sup>†,§</sup> Xingxing Diao,<sup>§,£</sup> and Jian Ye<sup>\*,†,δ,θ,β</sup>*

<sup>†</sup>State Key Laboratory of Systems Medicine for Cancer, School of Biomedical Engineering, Shanghai Jiao Tong University, Shanghai, 200030, P. R. China

<sup>§</sup>Shanghai Institute of Materia Medica, Chinese Academy of Sciences, Shanghai, 201210, P. R. China

<sup>£</sup>University of Chinese Academy of Sciences, Beijing, 100049, P. R. China

<sup>δ</sup>Institute of Medical Robotics, Shanghai Jiao Tong University, Shanghai, 200240, P.R. China

<sup>θ</sup>Shanghai Key Laboratory of Gynecologic Oncology, Ren Ji Hospital, School of Medicine, Shanghai Jiao Tong University, Shanghai, 200127, P.R. China

<sup>β</sup>Sixth People's Hospital, School of Medicine, Shanghai Jiao Tong University, Shanghai, 200233, P.R. China

### Footnotes

<sup>Δ</sup> These authors contributed equally.

\*To whom correspondence should be addressed. E-mail: [yejian78@sjtu.edu.cn](mailto:yejian78@sjtu.edu.cn)

# Contents

**Fig. S1.** Serum pretreatment by organic solvents for deproteinization. SERS spectra of erlotinib-doped serum (ERL+Serum), the supernatant of erlotinib-doped serum after isopropanol for deproteinization (ERL+Serum+Isopropanol), the supernatant of erlotinib-doped serum after ethanol for deproteinization (ERL+Serum+Ethanol), and the supernatant of erlotinib-doped serum after acetone for deproteinization (ERL+Serum+Acetone). The spectral silent region (SR) ( $1800 - 2800 \text{ cm}^{-1}$ ) is indicated by the red shade and the characteristic peak is indicated by a red arrow at  $1982 \text{ cm}^{-1}$ . .....3

**Fig. S2.** SERS spectra of Erlotinib solution (concentration:  $10^{-5} \text{ mg/mL}$ ) by using 532 nm (red) and 638 nm (black) of incident laser wavelengths. ....4

**Fig. S3.** Quantification of Erlotinib in the serum by analog method. (a) The mean spectra of the serum samples with different concentrations of Erlotinib ( $10^{-4} - 10^{-7} \text{ mg/mL}$ ) and without Erlotinib (control). (b) The peak signal from the mean spectra over all voxels. Each data point is shown by mean and the standard deviation is calculated from 3 measurements. ( $Peak\ signal = Area_{Erlotinib\ SR\ peak} - 3 \times Area_{noise}$ ).....5

**Fig. S4.** Comparison between the calibration curve of ERL in pure water solution (circle) and in serum using acetonitrile for deproteinization (square, also in **Fig. 4d**). The slopes ( $k$ ) of the calibration curves obtained by linear fitting on the log-log scale ( $logRPV = klogConcentration + b$ ) are 0.55 and 0.57, respectively. ....6

**Fig. S5.** Verification of SERS pharmacokinetic results by LC-MS/MS. Each datapoint is demonstrated by the mean erlotinib concentration in the serum samples collected from 3 rats and the error bar indicates the standard deviation ( $n = 3$ ). .....7

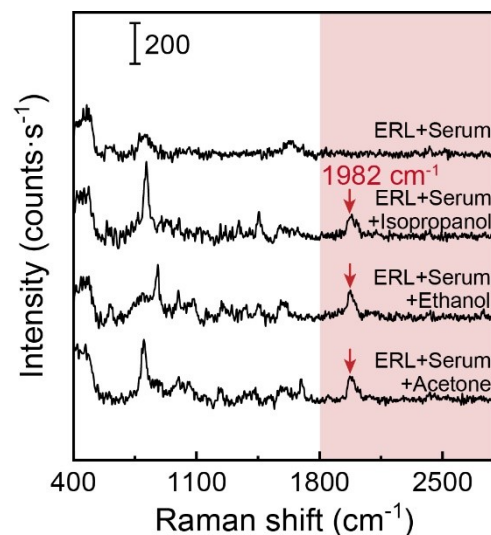

**Fig. S1.** Serum pretreatment by organic solvents for deproteinization. SERS spectra of erlotinib-doped serum (ERL+Serum), the supernatant of erlotinib-doped serum after isopropanol for deproteinization (ERL+Serum+Isopropanol), the supernatant of erlotinib-doped serum after ethanol for deproteinization (ERL+Serum+Ethanol), and the supernatant of erlotinib-doped serum after acetone for deproteinization (ERL+Serum+Acetone). The spectral silent region (SR) (1800 – 2800 cm<sup>-1</sup>) is indicated by the red shade and the characteristic peak is indicated by a red arrow at 1982 cm<sup>-1</sup>.

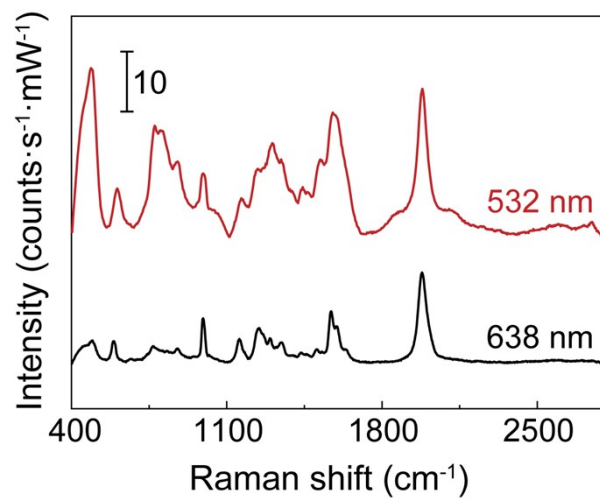

**Fig. S2.** SERS spectra of Erlotinib solution (concentration:  $10^{-5}$  mg/mL) by using 532 nm (red) and 638 nm (black) of incident laser wavelengths.

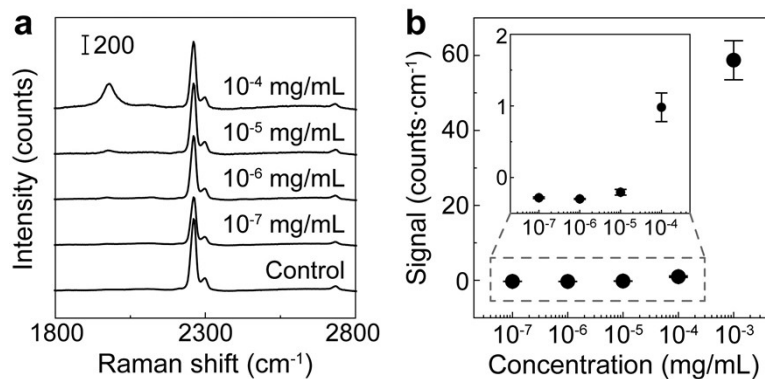

**Fig. S3.** Quantification of Erlotinib in the serum by analog method. (a) The mean spectra of the serum samples with different concentrations of Erlotinib ( $10^{-4} - 10^{-7}$  mg/mL) and without Erlotinib (control). (b) The peak signal from the mean spectra over all voxels. Each data point is shown by mean and the standard deviation is calculated from 3 measurements. ( $Peak\ signal = Area_{Erlotinib\ SR\ peak} - 3 \times Area_{noise}$ )

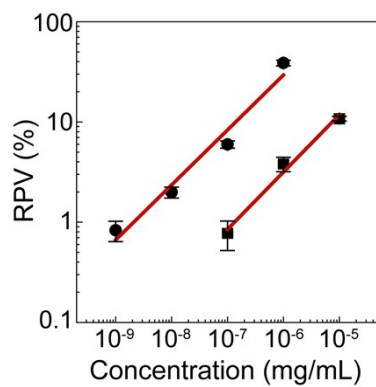

**Fig. S4.** Comparison between the calibration curve of ERL in pure water solution (circle) and in serum using acetonitrile for deproteinization (square, also in **Fig. 4d**). The slopes ( $k$ ) of the calibration curves obtained by linear fitting on the log-log scale ( $\log RPV = k \log Concentration + b$ ) are 0.55 and 0.57, respectively.

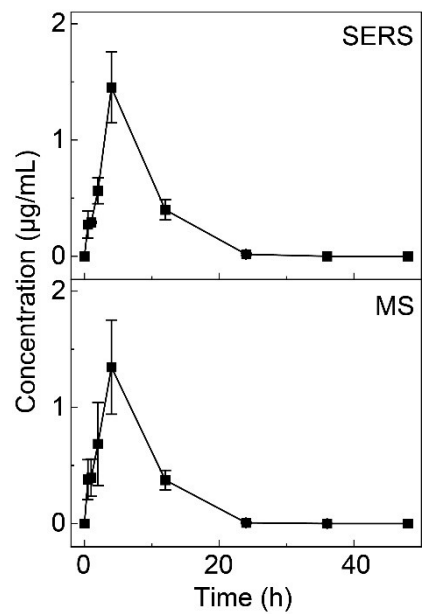

**Fig. S5.** Verification of SERS pharmacokinetic results by LC-MS/MS. Each datapoint is demonstrated by the mean erlotinib concentration in the serum samples collected from 3 rats and the error bar indicates the standard deviation (n = 3).
